# Supplementary material for: A high-performance fluorescent and ratiometric colorimetric detection of Cu2+ in practice
Source: Royal Society of Chemistry journal article supplement (doi:10.1039/d3ay01082a), 2023-01-01
Supplement: d3ay01082a1.pdf [file d3ay01082a1.pdf]

## Supplementary Information

### **A high-performance fluorescent and ratio-metric colorimetric detection of Cu<sup>2+</sup> in practice**

Lei Hu, Chengjie Sun, Renxiang Cheng, Xinhong Gao, Jiayi Zhou, Yi Wang, Ruping Jiang, Xiao  
Zhu, Peng Liu,\* Zhengquan Yan\*

*School of Chemistry and Chemical Engineering & Key Laboratory of Catalytic Conversion and  
Clean Energy in Universities of Shandong Province, Qufu Normal University, Qufu, 273165,  
China, Email: [liupeng@qfnu.edu.cn](mailto:liupeng@qfnu.edu.cn); [yanzhq2008@163.com](mailto:yanzhq2008@163.com)*

**Table S1.** Comparing the fluorescence quantum yield and Stokes shift of HNIT with the ones of other organic dyes reported previously

| Compounds                                  | FL quantum yield (%) | Stokes shift (nm) | Reference        |
|--------------------------------------------|----------------------|-------------------|------------------|
| BODIPY derivative                          | 51.0                 | 38                | 1                |
| Pyrazolyl-sulfonamide derivatives          | 7.7~25.7             | 260-280           | 2                |
| Limonene-derived SOA                       | 0.5                  | 95                | 3                |
| Hemicyanine-based probe                    | 21                   | 105               | 4                |
| 2,4-dihydroxybenzoyl hydrazine derivatives | 0.6-4.4              | 155               | 5                |
| Aza-substituted squaraines                 | No more than 18      | 4-12              | 6                |
| Quinoline-based derivatives                | 3-6                  | 55-100            | 7                |
| <b>HNIT</b>                                | <b>38.2</b>          | <b>110</b>        | <b>This work</b> |

1. S. J. Li, Y. J. Fu, C. Y. Li, Y. F. Li, L. H. Yi and O. Y. Juan, *Anal. Chim. Acta*, 2017, **994**, 73-81.
2. C. Amoah, C. Obuah, M. K. Ainooson, L. Hamenu, A. Oppong and A. Muller, *Tetrahedron*, 2023, **133**, 133276.
3. H. J. Lee, A. Laskin, J. Laskin and S. A. Nizkorodov, *Environ. Sci. Technol.*, 2013, **47**, 5763-5770.
4. L. Q. Niu, J. Huang, Z. J. Yan, Y. H. Men, Y. Luo, X. M. Zhou, J. M. Wang and J. H. Wang, *Spectrochim. Acta, Part A*, 2019, **207**, 123-131.
5. Z. L. Shi, Y. Y. Tu and S. Z. Pu, *RCS Adv.*, 2018, **8**, 6727-6732.
6. K. D. Volkova, V. B. Kovalska, M. Y. Losytskyy, L. V. Reis, P. F. Santos, P. Almeida, D. E. Lynch and S. M. Yarmoluk, *Dyes Pigm.*, 2011, **90**, 41-47.
7. D. Y. Wu, L. X. Xie, C. L. Zhang, C. Y. Duan, Y. G. Zhao and Z. J. Guo, *Dalton Trans.*, 2006, 3528-3533.
